# Supplementary material for: Sexually transmitted infections and factors associated with risky sexual practices among female sex workers: A cross sectional study in a large Andean city
Source: PLoS One. 2021 May 6;16(5):e0250117. doi: 10.1371/journal.pone.0250117 (PMC8101946; doi:10.1371/journal.pone.0250117)
Supplement: S1 Data — (XLSX) [file pone.0250117.s002.xlsx]

## Sheet: S1 Data
Code	Membership_FSWs_association	Temporary_migration_SW	Previous_treatment_STI	Age	Currently_diagnosed_STI	RSP	Self_report_STI
2	2	1	1	40	0	1	0
10	1	2	2	43	0	1	0
12	2	2	1	45	0	1	1
15	2	1	1	35	0	1	0
19	2	1	1	39	0	1	1
22	1	2	1	53	0	1	0
23	1	2	1	40	0	1	0
30	1	2	1	56	1	1	1
31	1	2	2	38	1	1	0
32	2	2	2	44	0	1	0
35	1	2	1	57	0	1	0
38	1	2	1	47	0	1	1
40	1	2	2	58	0	1	0
42	1	2	1	43	0	1	0
44	1	2	2	23	0	1	0
51	1	2	1	60	0	1	1
52	1	2	2	56	0	1	0
56	1	2	1	32	0	1	0
58	1	2	1	50	1	1	1
59	1	2	1	43	0	1	0
60	1	2	1	26	1	1	0
61	2	1	1	26	0	1	0
62	1	2	1	35	0	1	1
66	2	2	1	29	0	1	0
67	2	1	1	20	0	1	0
69	1	2	1	42	1	1	0
70	1	2	1	42	0	1	0
73	1	2	2	60	0	1	0
74	1	2	2	43	0	1	0
75	2	1	1	34	0	1	0
77	1	2	2	40	0	1	1
79	2	2	1	36	0	1	0
81	2	1	1	23	0	1	0
85	1	1	2	47	1	1	0
86	1	2	2	26	0	1	0
91	1	2	2	48	1	1	0
93	2	2	1	40	0	1	0
94	1	2	2	53	1	1	1
103	1	2	1	30	1	1	0
105	1	2	2	32	1	1	0
114	2	1	1	50	1	1	0
121	2	1	2	29	0	1	0
123	1	1	1	38	0	1	1
127	2	1	1	50	0	1	0
136	2	1	1	38	0	1	0
140	1	2	1	49	1	1	0
145	2	1	1	48	1	1	0
153	1	2	1	36	0	1	0
170	2	1	1	52	0	1	0
172	2	1	1	33	0	1	0
174	2	2	1	56	0	1	1
193	2	2	1	21	0	1	1
263	2	1	1	29	1	1	0
1	2	2	1	46	0	0	1
3	2	2	1	38	0	0	0
4	2	2	1	21	0	0	0
5	2	1	2	23	0	0	0
6	1	1	1	43	1	0	0
7	2	2	1	32	0	0	0
8	1	1	2	36	0	0	0
9	2	2	1	26	0	0	0
11	2	2	1	42	0	0	0
13	2	1	1	43	1	0	0
14	2	1	1	31	0	0	0
16	2	2	1	40	0	0	0
17	2	1	1	35	0	0	0
18	2	1	1	41	0	0	0
20	2	2	1	28	0	0	0
21	2	1	2	26	0	0	0
24	1	2	2	36	1	0	0
25	1	2	1	24	0	0	0
26	1	2	1	21	0	0	0
27	2	1	1	21	0	0	0
28	2	1	1	47	0	0	0
29	1	2	1	25	0	0	0
33	1	2	1	34	0	0	0
34	1	2	1	32	0	0	0
36	1	2	2	47	0	0	0
37	1	2	1	45	0	1	0
39	1	2	2	36	1	0	0
41	1	2	1	26	1	0	0
43	1	2	2	47	0	0	0
45	1	2	1	31	0	0	0
46	1	2	2	22	0	0	0
47	1	2	2	36	0	0	0
48	2	2	1	46	0	0	0
49	1	2	2	55	0	0	0
50	1	2	2	52	0	0	0
53	1	1	2	43	0	0	1
54	1	2	1	48	0	0	0
55	2	1	1	32	0	0	1
57	1	1	2	28	0	0	0
63	2	1	2	22	0	0	0
64	1	2	1	31	0	0	0
65	1	2	1	40	0	0	0
68	2	1	1	20	0	0	0
71	1	2	2	45	1	0	0
72	1	2	2	33	1	0	0
76	2	1	1	44	0	0	0
78	1	1	1	42	0	0	1
80	2	2	1	24	0	0	0
82	2	2	1	39	0	0	0
83	1	2	2	31	0	0	0
84	2	1	2	39	0	0	0
87	1	2	1	27	0	0	0
88	2	2	2	39	0	0	0
89	1	2	1	40	1	0	1
90	1	2	2	48	1	0	0
92	1	2	1	52	1	0	0
95	2	2	1	33	0	0	0
96	2	2	1	34	0	0	0
97	2	2	1	36	0	0	0
98	2	2	1	41	0	0	0
99	1	2	2	45	0	0	0
100	2	2	2	44	0	0	0
101	2	1	1	29	0	0	0
102	1	2	1	43	0	0	0
104	1	2	2	61	0	0	0
106	2	2	1	33	1	0	0
107	2	1	1	21	0	0	0
108	1	2	2	28	0	0	0
109	2	2	1	32	1	0	0
110	2	2	1	45	0	0	0
111	2	2	1	38	0	0	0
112	1	2	2	45	0	0	0
113	2	2	1	29	0	0	0
115	2	2	2	28	0	0	0
117	2	2	2	32	0	0	0
118	1	1	1	31	0	0	0
119	2	2	2	44	0	0	0
120	2	2	1	34	0	0	0
122	2	2	1	39	0	0	0
124	1	2	1	42	1	0	0
125	2	2	1	35	0	0	0
126	1	2	1	41	0	0	0
128	1	2	2	35	0	0	0
129	2	2	1	26	0	0	0
130	2	1	2	26	0	0	0
131	2	2	1	27	0	0	0
132	2	1	1	23	0	0	0
133	2	2	2	39	0	0	0
134	2	2	2	47	0	0	1
135	2	2	1	36	0	0	0
137	2	2	1	24	0	0	0
138	2	2	1	41	0	0	1
139	2	1	1	46	0	0	0
141	2	1	1	20	0	0	0
142	2	1	1	23	0	0	0
143	2	2	1	21	0	0	0
144	1	2	1	32	1	0	0
146	1	1	1	32	1	0	0
147	2	2	1	34	0	0	0
148	2	1	1	35	0	0	0
149	2	1	1	37	0	0	0
150	2	2	1	33	0	0	0
151	2	2	2	22	0	0	0
152	2	1	1	31	0	0	0
154	2	1	1	29	0	0	0
155	2	2	1	22	0	0	1
156	2	2	1	21	0	0	0
157	2	2	2	27	1	0	0
158	2	1	1	35	0	0	0
159	2	1	1	27	0	0	0
160	2	1	1	29	0	0	0
161	2	2	2	27	0	0	0
162	2	2	1	30	0	0	0
163	2	2	1	37	0	0	0
166	2	2	2	27	1	0	0
167	2	1	1	24	0	0	0
168	1	2	1	26	0	0	0
171	2	1	2	23	0	0	0
173	2	2	2	18	0	0	0
175	2	2	2	28	0	0	0
176	2	1	1	39	0	0	0
178	2	2	1	38	0	0	0
179	2	1	1	32	0	0	0
180	2	2	1	47	0	0	1
182	2	1	2	39	0	0	0
183	2	2	1	25	0	0	1
184	2	1	1	37	0	0	1
185	2	1	1	34	0	0	0
186	2	2	2	48	0	0	0
187	2	2	1	35	0	0	0
188	2	2	1	37	0	0	0
191	2	1	1	28	0	0	0
192	2	2	2	36	0	1	0
194	2	2	2	41	0	0	0
195	2	2	1	32	0	0	0
196	2	2	1	24	0	0	0
197	2	2	2	37	0	0	0
198	2	1	1	29	0	0	0
199	1	2	1	32	0	0	0
200	2	2	1	31	0	0	0
201	2	2	1	30	0	0	0
202	2	2	2	37	0	0	0
203	2	1	1	28	0	0	0
205	2	2	1	19	0	0	0
206	2	1	1	35	0	0	0
208	2	2	1	26	0	0	0
209	2	2	1	23	0	0	0
210	2	2	1	19	0	0	0
211	2	2	1	37	0	0	0
212	2	1	1	33	0	0	0
213	2	2	2	29	0	0	0
214	2	2	1	36	0	0	0
215	2	2	2	35	0	0	0
217	2	2	1	33	0	0	0
218	2	2	1	30	0	0	0
219	2	2	1	28	0	0	0
220	2	1	1	30	0	0	0
221	2	1	1	22	1	0	0
222	2	2	1	26	0	0	0
223	2	1	1	29	0	0	0
227	2	1	1	27	0	0	0
228	2	2	1	30	0	0	0
229	2	2	1	41	0	0	0
230	2	2	1	35	1	0	0
231	2	2	1	21	0	0	0
232	1	2	1	47	0	0	0
233	2	1	1	36	0	0	0
234	2	2	2	25	0	0	0
235	1	2	1	35	1	0	0
236	1	2	1	48	1	0	0
237	2	1	1	24	0	0	0
238	2	1	1	25	0	0	0
239	2	2	1	34	1	0	0
240	2	2	1	38	0	0	0
241	2	2	1	38	0	0	0
242	2	1	1	42	1	0	0
243	2	2	1	59	0	0	0
244	2	2	1	31	0	0	0
245	2	1	1	25	0	0	0
246	2	2	2	31	0	0	0
247	2	1	1	44	0	0	0
248	2	1	1	24	0	0	0
249	2	2	1	35	0	0	0
250	2	2	1	30	0	0	0
251	2	1	1	32	0	0	0
252	2	2	1	31	0	0	0
253	2	1	1	34	1	0	0
254	2	1	1	42	0	0	0
255	2	2	1	21	0	0	0
256	2	2	1	22	1	0	0
257	2	1	1	29	0	0	0
258	2	2	1	42	1	1	1
259	2	2	1	30	1	0	0
260	2	1	1	47	1	0	0
261	2	2	1	37	1	0	0
262	2	2	1	31	0	0	0
